# Supplementary material for: Neuronal populations in the occipital cortex of the blind synchronize to the temporal dynamics of speech
Source: eLife journal article supplement (doi:10.7554/elife.31640), 2018-01-17
Supplement: supp [file elife-31640-supp-v1.zip]

Archive with 2 entries (2 files):
- elife_poa_e31640_Transparent_Reporting_File.pdf
- elife_poa_e31640_Video_1.mp4
